# Supplementary material for: Integrating Gene Expression Data Into Genomic Prediction
Source: PubMed Central journal article supplement (PMC6397893; doi:10.3389/fgene.2019.00126), 2019-02-25
Supplement: Table_1.pdf [file Table_1.pdf]

supplementary material

Supplementary table 1: Empirical prediction accuracy  $\pm$  standard deviation of 9 traits in 5 statistical models for both females and males.

| Traits      | Female            |                    |                   |                   |                   | Male              |                    |                   |                   |                   |
|-------------|-------------------|--------------------|-------------------|-------------------|-------------------|-------------------|--------------------|-------------------|-------------------|-------------------|
|             | GBLUP             | TBLUP              | RKHS              | GTBLUP            | GRBLUP            | GBLUP             | TBLUP              | RKHS              | GTBLUP            | GRBLUP            |
| <b>STR</b>  | 0.239 $\pm$ 0.015 | 0.061 $\pm$ 0.013  | 0.123 $\pm$ 0.014 | 0.216 $\pm$ 0.014 | 0.239 $\pm$ 0.015 | 0.261 $\pm$ 0.015 | 0.049 $\pm$ 0.014  | 0.036 $\pm$ 0.014 | 0.237 $\pm$ 0.016 | 0.261 $\pm$ 0.015 |
| <b>STV</b>  | 0.240 $\pm$ 0.013 | 0.150 $\pm$ 0.014  | 0.155 $\pm$ 0.013 | 0.217 $\pm$ 0.013 | 0.240 $\pm$ 0.013 | 0.230 $\pm$ 0.014 | -0.044 $\pm$ 0.013 | 0.067 $\pm$ 0.011 | 0.222 $\pm$ 0.014 | 0.233 $\pm$ 0.014 |
| <b>AST</b>  | 0.210 $\pm$ 0.013 | -0.035 $\pm$ 0.011 | 0.182 $\pm$ 0.011 | 0.205 $\pm$ 0.013 | 0.211 $\pm$ 0.013 | 0.204 $\pm$ 0.014 | 0.130 $\pm$ 0.015  | 0.107 $\pm$ 0.014 | 0.215 $\pm$ 0.015 | 0.220 $\pm$ 0.015 |
| <b>FI</b>   | 0.200 $\pm$ 0.015 | 0.011 $\pm$ 0.015  | 0.158 $\pm$ 0.016 | 0.190 $\pm$ 0.015 | 0.215 $\pm$ 0.014 | 0.325 $\pm$ 0.013 | -0.081 $\pm$ 0.015 | 0.070 $\pm$ 0.013 | 0.324 $\pm$ 0.013 | 0.326 $\pm$ 0.014 |
| <b>OP2H</b> | 0.237 $\pm$ 0.012 | 0.051 $\pm$ 0.012  | 0.100 $\pm$ 0.011 | 0.224 $\pm$ 0.012 | 0.238 $\pm$ 0.012 | 0.096 $\pm$ 0.014 | -0.030 $\pm$ 0.013 | 0.010 $\pm$ 0.013 | 0.029 $\pm$ 0.016 | 0.096 $\pm$ 0.014 |
| <b>OPMS</b> | 0.183 $\pm$ 0.015 | 0.123 $\pm$ 0.015  | 0.130 $\pm$ 0.013 | 0.149 $\pm$ 0.013 | 0.183 $\pm$ 0.015 | 0.095 $\pm$ 0.015 | -0.113 $\pm$ 0.013 | 0.072 $\pm$ 0.014 | 0.045 $\pm$ 0.014 | 0.096 $\pm$ 0.015 |
| <b>OPIC</b> | 0.162 $\pm$ 0.012 | 0.038 $\pm$ 0.015  | 0.090 $\pm$ 0.015 | 0.139 $\pm$ 0.013 | 0.163 $\pm$ 0.012 | 0.175 $\pm$ 0.014 | -0.078 $\pm$ 0.011 | 0.050 $\pm$ 0.015 | 0.155 $\pm$ 0.015 | 0.175 $\pm$ 0.014 |
| <b>OP1H</b> | 0.168 $\pm$ 0.011 | -0.002 $\pm$ 0.013 | 0.001 $\pm$ 0.013 | 0.139 $\pm$ 0.012 | 0.169 $\pm$ 0.011 | 0.100 $\pm$ 0.012 | -0.025 $\pm$ 0.011 | 0.090 $\pm$ 0.015 | 0.030 $\pm$ 0.012 | 0.110 $\pm$ 0.012 |
| <b>OPEB</b> | 0.210 $\pm$ 0.012 | 0.165 $\pm$ 0.014  | 0.180 $\pm$ 0.014 | 0.208 $\pm$ 0.011 | 0.230 $\pm$ 0.012 | 0.170 $\pm$ 0.013 | 0.068 $\pm$ 0.015  | 0.056 $\pm$ 0.014 | 0.149 $\pm$ 0.012 | 0.170 $\pm$ 0.013 |
